# Supplementary material
Source: publisher figshare collection journal article supplement (https://sage.figshare.com/ndownloader/files/14862167)
Supplement: Supplementary file 1 [file 14862167]

**Table S1.** Patient questionnaire for standardized allergy history assessment

| Question number | Item                                                                                                                                               | Response (verbal questionnaire) |
|-----------------|----------------------------------------------------------------------------------------------------------------------------------------------------|---------------------------------|
| 1               | What medication allergies do you have?                                                                                                             |                                 |
| 2               | What reaction(s) occurred when you took the stated medication?                                                                                     |                                 |
| 3               | How many doses of medication did you take or receive prior to having the reaction?                                                                 |                                 |
| 4               | When did you take this medication and have this reaction (i.e. how much time has passed since you experienced this reaction with this medication)? |                                 |

## Appendix:

The criteria of Sampson et al were utilized to classify reactions consistent with anaphylaxis. One of the following three criteria classified a reaction as anaphylactic:

- Acute onset of an illness (minutes to several hours) with involvement of the skin, mucosal tissue, or both *AND AT LEAST ONE OF THE FOLLOWING*
  - Respiratory compromise
  - Reduced BP or associated symptoms of end-organ dysfunction
- Two or more of the following that occur rapidly after exposure to a likely allergen for that patient (minutes to several hours)
  - Involvement of the skin-mucosal tissue
  - Respiratory compromise
  - Reduced BP or associated symptoms
  - Persistent gastrointestinal symptoms
- Reduced BP after exposure to known allergen for that patient (minutes to several hours)
  - Systolic BP of less than 90 mm Hg or greater than 30% decrease from that person's baseline
